# Supplementary material for: Silver sulfide nanoparticles in aqueous environments: formation, transformation and toxicity
Source: Royal Society of Chemistry journal article supplement (doi:10.1039/c9en00138g), 2019-01-01
Supplement: c9en00138g1.pdf [file c9en00138g1.pdf]

## Supporting Information

# **Silver Sulfide Nanoparticles in Aqueous Environments: Formation, Transformation and Toxicity**

Di He<sup>1</sup>, Shikha Garg<sup>2</sup>, Zimeng Wang<sup>3</sup>, Lingxiangyu Li<sup>4</sup>, Hongyan Rong<sup>2</sup>, Xiaoming Ma<sup>1</sup>,

Taicheng An<sup>1\*</sup> and T. David Waite<sup>2</sup>

<sup>1</sup> Guangzhou Key Laboratory of Environmental Catalysis and Pollution Control, Guangdong Key Laboratory of Environmental Catalysis and Health Risk Control, School of Environmental Science and Engineering, Institute of Environmental Health and Pollution Control, Guangdong University of Technology, Guangzhou 510006, China.

<sup>2</sup>Water Research Centre, School of Civil and Environmental Engineering, The University of New South Wales, Sydney, NSW 2052, Australia

<sup>3</sup>Department of Environmental Science and Engineering, Fudan University, Shanghai 200433, China.

<sup>4</sup>Department of Chemistry, Zhejiang Sci-Tech University, Hangzhou 310018, China.

*Environmental Science: Nano*

**January, 2019**

---

Corresponding author: Professor Taicheng An, Email: [antc99@gdut.edu.cn](mailto:antc99@gdut.edu.cn)

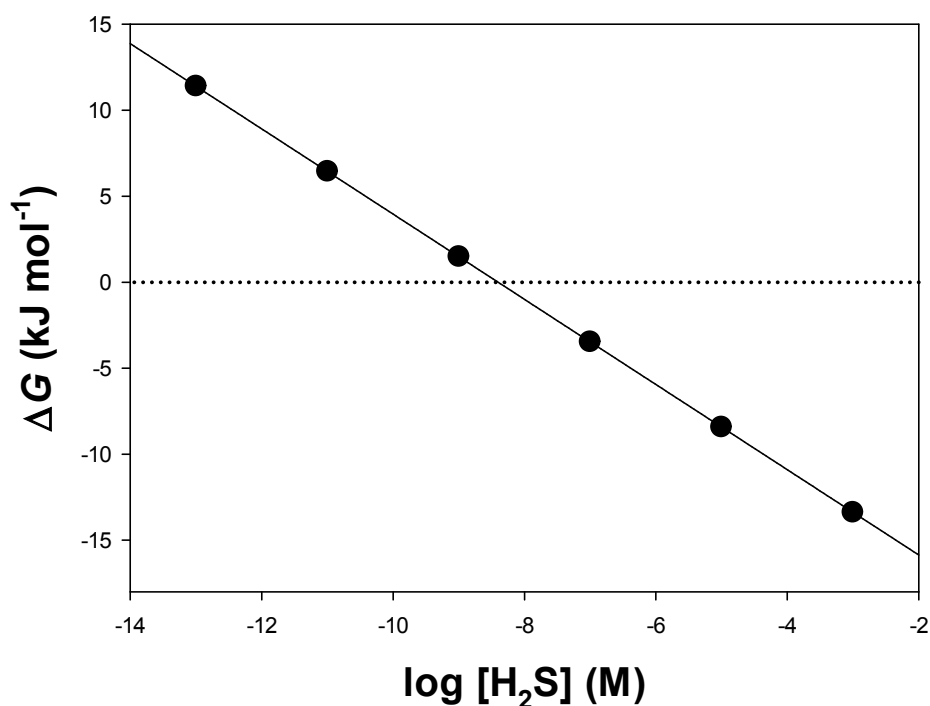

**Figure S1.** Calculation of  $\Delta G$  for the reaction between Ag(0) and H<sub>2</sub>S as a function of [H<sub>2</sub>S].

The reaction between Ag(0) and sulfide may occur as following (Eq. S1),

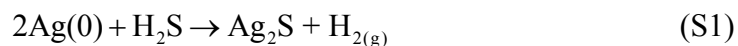

At equilibrium,

$$\log K = \log Q = -\log[\text{H}_2\text{S}_{(\text{aq})}] + \log[\text{H}_{2(\text{aq})}] \quad (\text{S2})$$

where  $\log K = 2.0327$  and  $[\text{H}_{2(\text{aq})}]$  normally in water is  $4.29 \times 10^{-7}$  M at 25°C, then

$$[\text{H}_2\text{S}_{(\text{aq})}] = 3.98 \times 10^{-9} \text{ M} \quad (\text{S3})$$

As such, when the concentration of H<sub>2</sub>S<sub>(aq)</sub> is over ~4 nM, the reaction of Ag(0) with H<sub>2</sub>S under anoxic environment is favored.

$\Delta G$  in Figure S1 can be calculated as a function of [H<sub>2</sub>S],

$$\Delta G = 2.3RT \log(Q / K) \quad (\text{S9})$$

where  $T = 298$  K,  $R = 8.314$  J K<sup>-1</sup> mol<sup>-1</sup>,  $K = 2.0327$  and  $[\text{H}_{2(\text{aq})}] = 4.29 \times 10^{-7}$  M at 25°C.

The oxygenation of Ag<sub>2</sub>S may occur as following (Eq. S5):

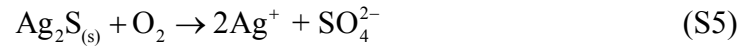

At equilibrium,

$$\log K = -\log[\text{O}_{2(\text{aq})}] + 2\log[\text{Ag}^+] + [\text{SO}_4^{2-}] \quad (\text{S6})$$

where  $\log K = 102.28$  and  $[\text{O}_{2(\text{aq})}] = 0.25 \text{ mM}$  under air-saturated conditions at  $25 \text{ }^\circ\text{C}$ .

According to Eq. S4,  $\Delta G$  is always  $<0$  under oxic environments where concentrations of  $\text{Ag}^+$  and  $\text{SO}_4^{2-}$  are in the typical concentrations.

The oxygenation of Ag<sub>2</sub>S may occur as following (Eq. S7):

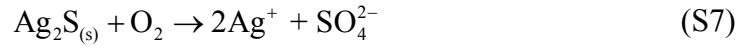

The reaction quotient ( $Q$ ) is:

$$\log Q = -\log[\text{O}_{2(\text{aq})}] + 2\log[\text{Ag}^+] + [\text{SO}_4^{2-}] \quad (\text{S8})$$

where  $[\text{O}_{2(\text{aq})}] = 0.25$  mM under air-saturated conditions. Comparison of  $Q$  (actual composition) with the value of  $K$  (equilibrium composition) determines if the reaction can occur ( $\Delta G < 0$ ):

$$\Delta G = 2.3RT \log(Q / K) \quad (\text{S9})$$

where at 25 °C  $\log K = 102.28$ ;  $T = 298$  K and  $R = 8.314$  J K<sup>-1</sup> mol<sup>-1</sup>. As such,  $\Delta G < 0$  under oxic environments where concentrations of Ag<sup>+</sup> and SO<sub>4</sub><sup>2-</sup> are in the range of micromolar to millimolar.

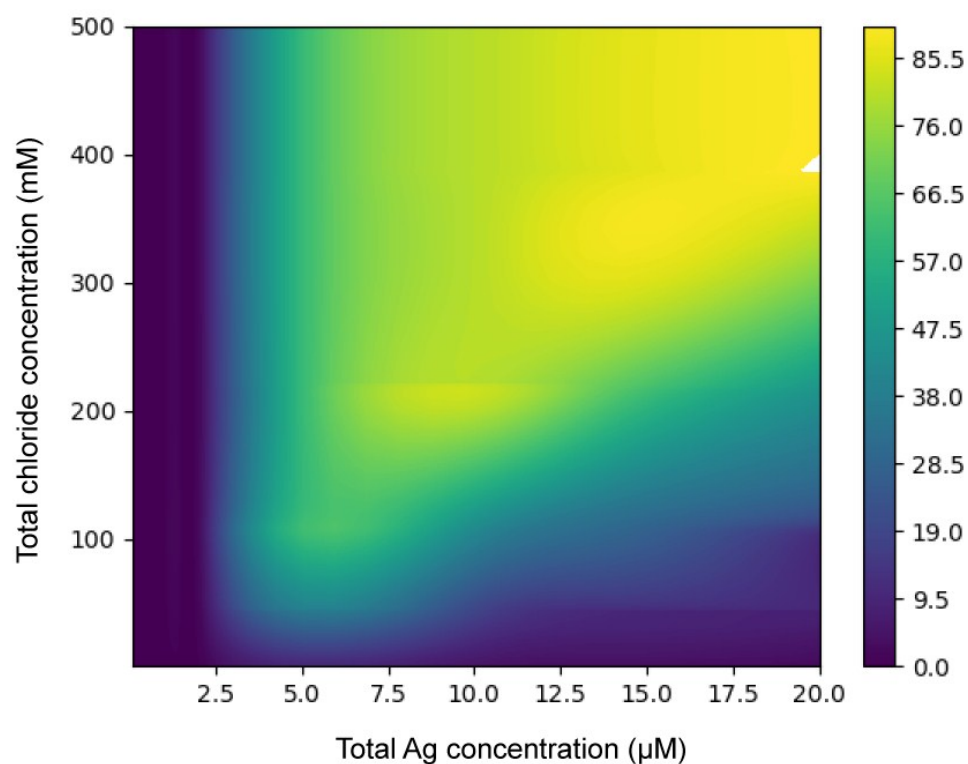

**Figure S2.** Thermodynamic speciation calculation showing % Ag present as dissolved AgCl complexes for varying total Ag(I) and  $\text{Cl}^-$  concentrations at pH 8.0 in the presence of 1  $\mu\text{M}$  of total sulfide.

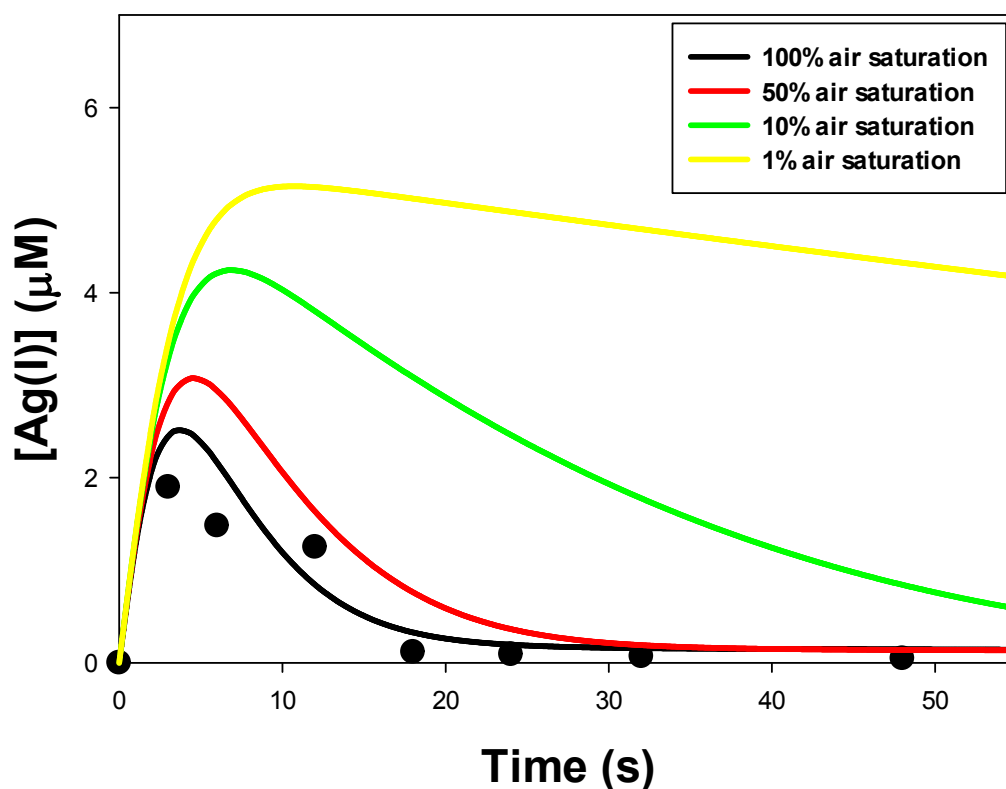

**Figure S3.** Effect of dissolved oxygen on light irradiation induced dissolution kinetics of Ag<sub>2</sub>S-NPs in the presence of Fe(III). Symbols are experimental data from Li et al<sup>1</sup>; Lines in Figure SI are the model fittings based on reaction scheme I (Table 1) under various air saturation conditions. Experimental conditions: [Ag<sub>2</sub>S-NPs]<sub>0</sub> = 5.0 mg L<sup>-1</sup>; [Fe(III)]<sub>0</sub> = 2.0 mg L<sup>-1</sup>; pH = 5.0. Reprinted with permission from the American Chemical Society.

## References

1. Li, L. X. Y.; Zhou, Q. F.; Geng, F. L.; Wang, Y. W.; Jiang, G. B., Formation of nanosilver from silver sulfide nanoparticles in natural waters by photoinduced Fe(II, III) redox cycling. *Environ. Sci. Technol.* **2016**, *50*, (24), 13342-13350.
